# Supplementary material
Source: PubMed Central journal article supplement (PMC6446198)
Supplement: EMBR-20-e46762-s001.pdf [file EMBR-20-e46762-s001.pdf]

## APPENDIX

### **Ash1 counteracts Polycomb repression independent of H3K36 methylation.**

Eshagh Dorafshan<sup>1</sup>, Tatyana G. Kahn<sup>1</sup>, Alexander Glotov<sup>1</sup>, Mikhail Savitsky<sup>1</sup>, Matthias Walther<sup>2,3</sup>, Gunter Reuter<sup>2</sup> and Yuri B. Schwartz<sup>1, #</sup>

<sup>1</sup> Department of Molecular Biology, Umeå University, Umeå, Sweden.

<sup>2</sup> Institute of Developmental Genetics, Martin-Luther University of Halle-Wittenberg, Halle, Germany.

<sup>3</sup> Max Planck Institute of Immunobiology and Epigenetics, Freiburg, Germany.

#correspondence should be addressed to: [yuri.schwartz@umu.se](mailto:yuri.schwartz@umu.se)

### **Table of contents**

|                           |    |
|---------------------------|----|
| Appendix Figure S1 .....  | 2  |
| Appendix Figure S2 .....  | 3  |
| Appendix Figure S3 .....  | 5  |
| Appendix Figure S4 .....  | 7  |
| Appendix Figure S5 .....  | 9  |
| Appendix Figure S6 .....  | 10 |
| Appendix Figure S7 .....  | 12 |
| Appendix Figure S8 .....  | 15 |
| Appendix Figure S9 .....  | 17 |
| Appendix Figure S10 ..... | 18 |
| Appendix Figure S11 ..... | 19 |
| Appendix Figure S12 ..... | 21 |
| Appendix Table S1 .....   | 23 |
| Appendix Table S2 .....   | 26 |
| Appendix Table S3 .....   | 27 |

## Appendix Figure S1

*Set2*<sup>1</sup>

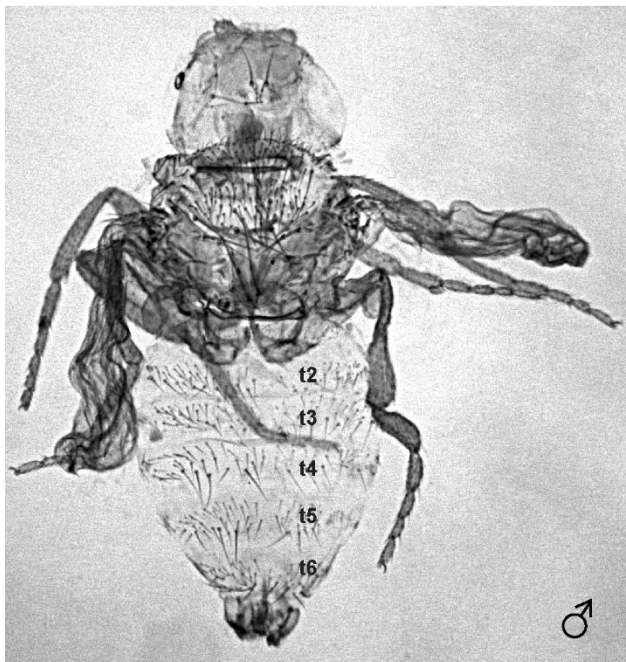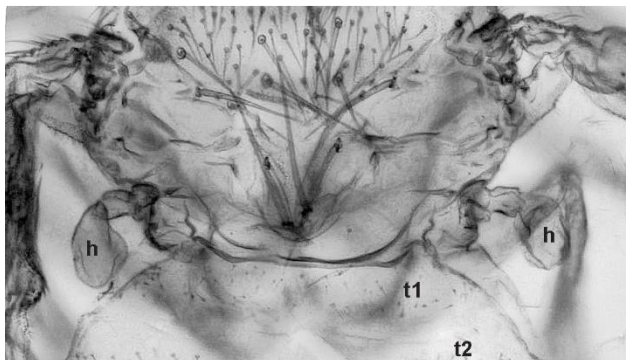

**Appendix Figure S1. Adult phenotype of the *Set2* loss of function mutant.** Most flies homozygous for the *Set2*<sup>1</sup> null allele die at the late larval or early pupal stages. Out of 221 homozygous *Set2*<sup>1</sup> pupae, only one male fully developed to pharate adult stage. In that animal, shown here, no homeotic transformations are visible. The halteres (h), third legs and all tergites (t1-t6) appear normal and show no signs of posterior to anterior transformations.

## Appendix Figure S2

A

Forward cross ♀  $\frac{Ubi-OneStrep::ASH1\ ORF}{CyO}; \frac{ash1^{22}}{TM3,Ser,Act-GFP}$  × ♂  $\frac{Ubi-OneStrep::ASH1\ ORF}{CyO}; \frac{ash1^{9011}}{TM3,Ser,Act-GFP}$

Reverse cross ♀  $\frac{Ubi-OneStrep::ASH1\ ORF}{CyO}; \frac{ash1^{9011}}{TM3,Ser,Act-GFP}$  × ♂  $\frac{Ubi-OneStrep::ASH1\ ORF}{CyO}; \frac{ash1^{22}}{TM3,Ser,Act-GFP}$

Progeny Classes

Class I  $\frac{Ubi-OneStrep::ASH1\ ORF}{Ubi-OneStrep::ASH1\ ORF}; \frac{ash1^{22}}{ash1^{9011}}$

Class II  $\frac{Ubi-OneStrep::ASH1\ ORF}{Ubi-OneStrep::ASH1\ ORF}; \frac{ash1^{22}}{TM3,Ser,Act-GFP}$  and  $\frac{Ubi-OneStrep::ASH1\ ORF}{Ubi-OneStrep::ASH1\ ORF}; \frac{ash1^{9011}}{TM3,Ser,Act-GFP}$

Class III  $\frac{Ubi-OneStrep::ASH1\ ORF}{CyO}; \frac{ash1^{22}}{ash1^{9011}}$

Class IV  $\frac{Ubi-OneStrep::ASH1\ ORF}{CyO}; \frac{ash1^{22}}{TM3,Ser,Act-GFP}$  and  $\frac{Ubi-OneStrep::ASH1\ ORF}{CyO}; \frac{ash1^{9011}}{TM3,Ser,Act-GFP}$

B

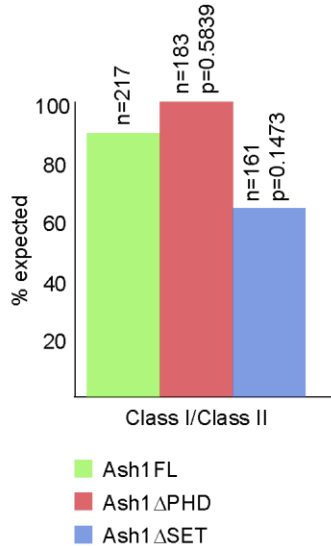

C

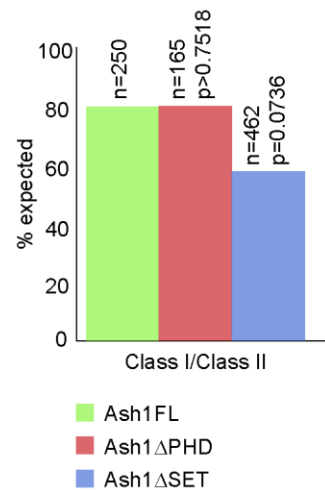

### Appendix Figure S2. Complementation of *ash1* mutations by transgenic Ash1 variants.

(A) Schematics of crosses and the progeny classes. To test whether different variants of the transgenic Ash1 can compensate for the *ash1* loss of function, the transgenes were introduced into the flies trans-heterozygous for *ash1*<sup>22</sup> and *ash1*<sup>9011</sup> alleles. To this effect, females of a

strain containing one copy of the Ash1 transgene, balanced over *CyO* on the second chromosome, and the *ash1<sup>22</sup>* allele, balanced over *TM3,Ser,Act-GFP* on the third chromosome, were crossed to males from a strain containing the same second chromosome combination but *ash1<sup>9011</sup>* instead of *ash1<sup>22</sup>* on the third chromosome (Forward cross). The reciprocal cross was also set up, where the genotypes of males and females were switched (Reverse cross). Three different Ash1 transgenes were used in this experiment. One (*Ash1FL*) contained the full-length *ash1* Open Reading Frame (ORF), and the two truncated variants contained ORFs that lacked either the SET domain (*Ash1ΔSET*) or the PHD domain (*Ash1ΔPHD*). The expression of all transgenes was driven by the *Ubiquitin (Ubi-p63E)* promoter. In the progeny, Class I (yellow rectangle) and Class II (grey rectangle) contained two copies of the Ash1 transgenes. **(B-C)** The viability of *ash1<sup>22</sup>/ash1<sup>9011</sup>* flies complemented by different transgenic Ash1 variants. The ratio between Class I/Class II progeny was calculated for each transgenic Ash1 variant to gauge the viability (rescue). In the case of complete rescue, the Class I/Class II ratio is expected to be ½, which we designated as 100%. The  $\chi^2$  test shows that the two copies of *Ash1ΔSET*, *Ash1ΔPHD* and *Ash1FL* transgenes restore the viability of *ash1<sup>22</sup>/ash1<sup>9011</sup>* flies to comparable extent. Graph **(B)** corresponds to the Forward cross in **(A)** and graph **(C)** corresponds to the Reverse cross. n indicates the number of Class I + Class II progeny counted.

## Appendix Figure S3

A

Step 1

$$\text{♀ } \frac{Elav-Gal4, \Delta HisC}{CyO}; \frac{VK33\{H3K36Rx12\}}{TM6, Tb} \times \text{♂ } \frac{+}{+}; \frac{ash1^{22}}{TM3, Ser, Act-GFP}$$

Step 2

$$\text{♀ } \frac{+}{CyO}; \frac{ash1^{22}}{VK33\{H3K36Rx12\}} \times \text{♂ } \frac{If}{CyO}; \frac{MKRS}{TM6, Tb}$$

Step 3

$$\text{♀ } \frac{If}{CyO}; \frac{VK33\{H3K36Rx12\}, ash1^{22}}{TM6, Tb} \times \text{♂ } \frac{+}{+}; \frac{ash1^{9011}}{TM3, Ser, Act-GFP}$$

Step 4

$$\text{a) } \text{♀ } \frac{+}{If}; \frac{VK33\{H3K36Rx12\}, ash1^{22}}{TM3, Ser, Act-GFP} \times \text{♂ } \frac{+}{CyO}; \frac{ash1^{9011}}{TM6, Tb} \quad \text{b) } \text{♀ } \frac{Elav-Gal4, \Delta HisC}{CyO}; \frac{VK33\{H3K36Rx12\}}{TM6, Tb} \times \text{♂ } \frac{If}{CyO}; \frac{MKRS}{TM6, Tb}$$

Step 5

$$\text{♀ } \frac{If}{CyO}; \frac{VK33\{H3K36Rx12\}, ash1^{22}}{TM6, Tb} \times \text{♂ } \frac{Elav-Gal4, \Delta HisC}{CyO}; \frac{MKRS}{TM6, Tb}$$

Step 6

$$\frac{Elav-Gal4, \Delta HisC}{CyO}; \frac{VK33\{H3K36Rx12\}, ash1^{22}}{TM6, Tb}$$

B

Step 1

$$\text{♀ } \frac{If}{CyO}; \frac{MKRS}{TM6, Tb} \times \text{♂ } \frac{UAS-2xYFP, \Delta HisC}{CyO, Ftz, lacZ}; \frac{+}{+}$$

Step 2

$$\text{a) } \text{♀ } \frac{UAS-2xYFP, \Delta HisC}{CyO}; \frac{+}{TM6, Tb} \times \text{♂ } \frac{UAS-2xYFP, \Delta HisC}{CyO}; \frac{+}{MKRS} \quad \text{b) } \text{♀ } \frac{+}{CyO}; \frac{ash1^{9011}}{TM6, Tb} \times \text{♂ } \frac{+}{If}; \frac{ash1^{9011}}{TM6, Tb}$$

Step 3

$$\text{♀ } \frac{UAS-2xYFP, \Delta HisC}{CyO}; \frac{MKRS}{TM6, Tb} \times \text{♂ } \frac{If}{CyO}; \frac{ash1^{9011}}{TM6, Tb}$$

Step 4

$$\frac{UAS-2xYFP, \Delta HisC}{CyO}; \frac{ash1^{9011}}{TM6, Tb}$$

**Appendix Figure S3. Generation of fly strains that combine the *Elav-Gal4, ΔHisC* or *UAS-2xYFP, ΔHisC*, chromosomes with *ash1* mutations and the *VK33{H3K36Rx12}* transgene.**

(A) To combine the *Elav-Gal4, ΔHisC* chromosome with the *ash1*<sup>22</sup> allele and the *VK33{H3K36Rx12}* transgene, the female flies with the *Elav-Gal4, ΔHisC/CyO* 2<sup>nd</sup> chromosomes, and the *VK33{H3K36Rx12}* transgene on the third chromosome, were crossed with the *ash1*<sup>22</sup>/*TM3, Ser, Act-GFP* males (Step 1). From the progeny of Step 1, females lacking the *TM3, Ser, Act-GFP* balancer but containing the *CyO* balancer were crossed to males of the double-balancer strain (*If/CyO; MKRS/TM6, Tb*) (Step 2). The recombination between *ash1*<sup>22</sup>

and *VK33{H3K36Rx12}* occurred in females in this step. Individual *If/CyO* females with the *TM6,Tb* balancer chromosome, from the progeny of Step 2, were crossed to the *ash1<sup>9011</sup>/TM3,Ser,Act-GFP* males (Step 3). Allowing the females to lay eggs, the genomic DNA of these females was extracted and screened by PCR for the presence of the *ash1<sup>22</sup>* mutation and the *VK33{H3K36Rx12}* transgene (see Appendix Figure S5). From the progeny of the Step 3 crosses, the females that contained the recombinant *VK33{H3K36Rx12},ash1<sup>22</sup>* chromosome, the *If* marker and the *TM3,Ser,Act-GFP* balancer were crossed to males that carried the *CyO* and *TM6,Tb* balancers (Step 4a). In parallel (Step 4b), the females from the *Elav-Gal4,ΔHisC/CyO ; VK33{H3K36Rx12}/TM6b,Tb* strain were crossed to males of the double-balancer strain. From the progeny of Step 4a, the *If/CyO* females with the *TM6,Tb* balancer were crossed with the *CyO* males carrying both the *MKRS* marker and the *TM6,Tb* balancer but lacking the *If* marker (Step 5). In Step 6, the females and males carrying the *CyO* and *TM6,Tb* balancer chromosomes but lacking the *If* and *MKRS* markers were selected to establish the *Elav-Gal4,ΔHisC/CyO ; VK33{H3K36Rx12},ash1<sup>22</sup>/TM6,Tb* fly stock. **(B)** To combine the *UAS-2xYFP,ΔHisC* chromosome with the *ash1<sup>9011</sup>* allele, females of the double-balancer line were crossed with the *UAS-2xYFP,ΔHisC/CyO* males (Step 1). In Step 2, the females carrying *CyO* and *TM6,Tb* balancers and lacking the *If* and *MKRS* markers were crossed with the *CyO* males lacking the *If* marker and carrying the *MKRS* chromosome (Step 2a). In parallel (Step 2b), the *CyO* females and the *If* males, both carrying *TM6,Tb* balancer, and both from the progeny of Step 3 in **(A)**, were crossed to each other. In Step 3, females with the *MKRS* chromosome and the *TM6,Tb* balancer from the progeny of Step 2a were crossed to the *If/CyO* males carrying *TM6,Tb* balancer, from the progeny of Step 2b. In the next step the flies with the *CyO* and *TM6,Tb* balancers but lacking *If* and *MKRS* were selected from the progeny of Step 3 to establish the strain with the genotype shown in Step 4.

## Appendix Figure S4

A

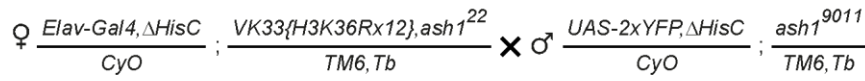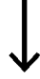

Class I

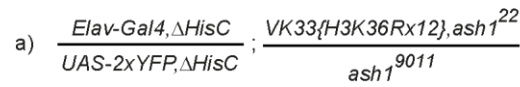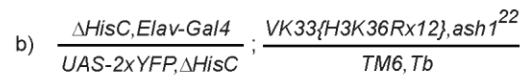

Class II

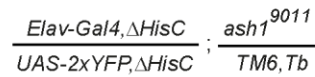

Class III

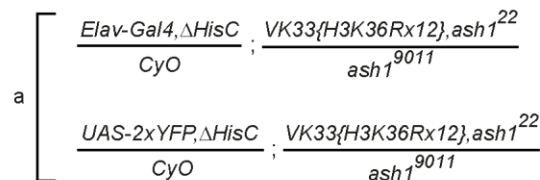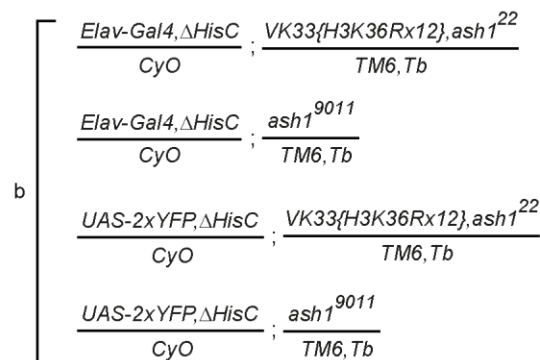

B

|                          | YFP positive (Class I) |           | YFP negative (Class III) |           |
|--------------------------|------------------------|-----------|--------------------------|-----------|
| Starting number of flies | 500                    |           | 650                      |           |
| Number of dead pupae     | Class Ia (non-Tb)      | 2         | 0                        |           |
|                          | Class Ib (Tm6, Tb)     | 186 (37%) | 0                        |           |
| Number of flies hatched  | 0                      |           | Class IIIa (non-Tb)      | 0         |
|                          | 0                      |           | Class IIIb (Tm6, Tb)     | 403 (62%) |

### Appendix Figure S4. Genetic interaction between the *ash1* and *H3K36R* mutations. (A)

To generate the  $\Delta HisC; ash1^{-1}; H3K36R$  animals, the  $Elav-Gal4, \Delta HisC / CyO ; VK33\{H3K36Rx12\}, ash1^{22} / TM6, Tb$  flies from Appendix Figure S3A were crossed with the

*UAS-2xYFP,ΔHisC/CyO; ashI<sup>9011</sup>/TM6,Tb* flies from Appendix Figure S3B. In the progeny, three classes are expected. Classes I and II both show the YFP signal in the fluorescent stereomicroscope and therefore are distinguishable from Class III which lacks the YFP signal. Although both Classes I and II show the YFP signal, the Class II progeny die at early embryonic stage due to the lack of zygotic histone supply. The *Tb* marker on the *TM6,Tb* chromosome is used to distinguish the Class Ib flies from Class Ia and Class IIIb flies from Class IIIa. **(B)** Analysis of Class I and Class III (control) viability. While no adult flies emerge from the Class I larvae, 62% (close to expected) of the Class III (shown as class IIIb) larvae develop to the adult fly stage. Note that Class IIIa larvae are expected to die since they carry both the *ashI<sup>22</sup>* and *ashI<sup>9011</sup>* alleles.



## Appendix Figure S5

- 1: *VK33{H3K36Rx12}, ash1<sup>22</sup>* fly #1      5: *ash1<sup>22</sup> /TM3,Ser,ActGFP*  
 2: *VK33{H3K36Rx12}, ash1<sup>22</sup>* fly #2      6: *Elav-Gal4, ΔHisC / CyO ; VK33{H3K36Rx12}/TM6, Tb*  
 3: *VK33{H3K36Rx12}, ash1<sup>22</sup>* fly #3      7: wild-type (Oregon R)  
 4: *VK33{H3K36Rx12}, ash1<sup>22</sup>* fly #4      8: No Template Control

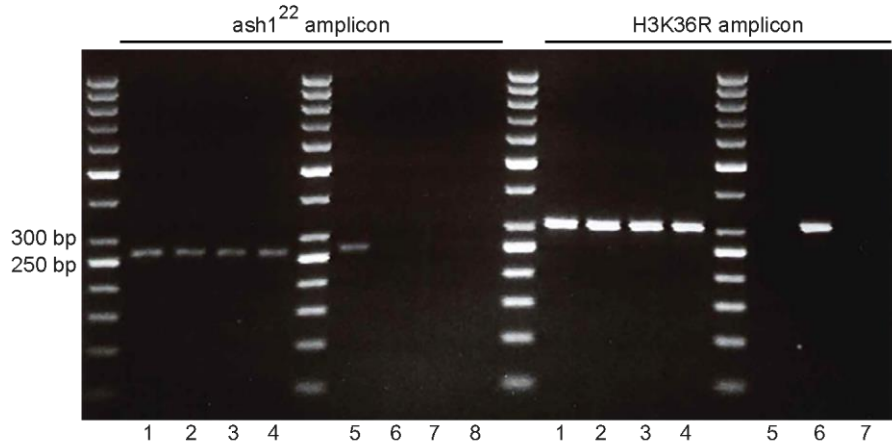

| Amplicons                | Forward primer   | Reverse primer     | Product in mutant/transgenic line | Product in wild-type |
|--------------------------|------------------|--------------------|-----------------------------------|----------------------|
| <i>ash1<sup>22</sup></i> | <i>ash1-22.2</i> | <i>ash1-21.rev</i> | 264 bp                            | No product           |
| H3K36R                   | H3K36R           | <i>His3-rev</i>    | 300 bp                            | No product           |

**Appendix Figure S5. The screen for the recombination between *ash1<sup>22</sup>* and the *H3K36R* transgene.** The single flies, described in Appendix Figure S3A, were genotyped by PCR, using the primer specific for the *ash1<sup>22</sup>* mutation and the *VK33{H3K36Rx12}* transgene. The forward primer in the *ash1<sup>22</sup>* amplicon is designed to match the single nucleotide substitution in the *ash1<sup>22</sup>* mutation and therefore anneals only to the mutant but not to the wild-type genomic DNA. In the H3K36R amplicon, one of the primers (H3K36R) uses the three nucleotide-difference between the wild-type and the transgenic copies of the *His3.2* gene and therefore is specific for the *VK33{H3K36Rx12}* transgene as the template for PCR reaction. Four single flies positive for both the *ash1<sup>22</sup>* mutation and the *VK33{H3K36Rx12}* transgene are shown here. PCR products were analyzed by the electrophoresis in 2% agarose gel. M = 50bp DNA Ladder.

## Appendix Figure S6

### Step 1

$$\text{♀ } \frac{y,w,rox1[ex6],rox2[4-9]}{FM7i,ActGFP} ; \frac{nos[4L],Sco[rv9R],b[1]}{CyO,ActGFP} ; +/+ \times \text{♂ } \frac{w}{+} ; \frac{UAS-2xYFP,\Delta HisC}{CyO,Ftz,lacZ} ; +/+$$

### Step 2

$$\text{♀ } \frac{w}{FM7i,ActGFP} ; \frac{UAS-2xYFP,\Delta HisC}{CyO,ActGFP} ; +/+ \times \text{♂ } \frac{w,\Delta His3.3B(w^+),hsp-Flp}{+} ; \frac{Df(2L)His3.3A}{SM6B,Cy} ; +/+$$

### Step 3

$$\text{♀ } \frac{w,\Delta His3.3B(w^+),hsp-Flp}{FM7i,ActGFP} ; \frac{Df(2L)His3.3A}{UAS-2xYFP,\Delta HisC} ; +/+ \times \text{♂ } \frac{FM7i,ActGFP}{+} ; \frac{Df(2L)His3.3A \text{ or } UAS-2xYFP,\Delta HisC}{CyO,ActGFP \text{ or } SM6B,Cy} ; +/+$$

### Step 4

$$\text{♀ } \frac{w,\Delta His3.3B(w^+),hsp-Flp}{FM7i,ActGFP} ; \frac{Df(2L)His3.3A,UAS-2xYFP,\Delta HisC}{CyO,ActGFP \text{ or } SM6B,Cy} ; +/+ \times \text{♂ } \frac{FM7i,ActGFP}{+} ; \frac{nos[4L],Sco[rv9R],b[1]}{CyO,ActGFP} ; +/+$$

### Step 5

$$\text{♀ } \frac{w,\Delta His3.3B(w^+),hsp-Flp}{FM7i,ActGFP} ; \frac{Df(2L)His3.3A,UAS-2xYFP,\Delta HisC}{CyO,ActGFP} ; +/+ \times \text{♂ } \frac{w,\Delta His3.3B(w^+),hsp-Flp}{+} ; \frac{lf}{CyO} ; +/+$$

### Step 6

$$\text{♀ } \frac{w,\Delta His3.3B(w^+),hsp-Flp}{w,\Delta His3.3B(w^+),hsp-Flp} ; \frac{Df(2L)His3.3A,UAS-2xYFP,\Delta HisC}{CyO} ; +/+ \times \text{♂ } \frac{w,\Delta His3.3B(w^+),hsp-Flp}{+} ; \frac{Df(2L)His3.3A,UAS-2xYFP,\Delta HisC}{CyO} ; +/+$$

**Appendix Figure S6. Generation of the *Drosophila* strain that combines the *His3.3* deletions and the *UAS-2xYFP,ΔHisC* chromosome.** To generate the  $w,\Delta His3.3B(w^+),hsp-Flp ; Df(2L)His3.3A,ElavGal4,\Delta HisC/CyO ; +/+$  fly strain, the *FM7i,ActGFP* chromosome was first introduced into the *UAS-2xYFP,ΔHisC/CyO ; +/+* fly strain (Step 1). In the progeny of Step 1, the females with *FM7i,ActGFP* balancer and without the second chromosome marked by *Sco* (therefore carrying the *UAS-2xYFP,ΔHisC* chromosome) were collected and crossed to males of the  $w,\Delta His3.3B(w^+),hsp-Flp ; Df(2L)His3.3A/SM6B,Cy$  genotype (Step 2). In Step 3, the females with *FM7i,ActGFP* balancer (carrying the *His3.3B* deletion) and without second chromosome balancer were selected. This provides a chance for recombination between *Df(2L)His3.3A* and *UAS-2xYFP,ΔHisC*. These females were crossed with the males hemizygous for *FM7i,ActGFP* and carrying either the *SM6B,Cy* or *CyO,ActGFP* second chromosome balancer. In Step 4, the female progeny of Step 3, carrying either *SM6B,Cy* or *CyO,ActGFP* were selected and crossed individually with the *FM7i,ActGFP ; nos[4L],sco[rv9R],b[1]/CyO,ActGFP* males. Note that all females contained the *His3.3B*

deletion balanced over *FM7i,ActGFP*. After several days of egg deposition, genomic DNA was extracted from the single females of each cross. This DNA was used to screen for recombination on the second chromosome (simultaneous presence of the  $\Delta HisC$  deletion, the *UAS-2xYFP* transgene, and the *His3.3A* deletion). Note that the *CyO,ActGFP* balancer will interfere with the detection of the YFP signal used to select for embryos homozygous for  $\Delta HisC$  (for details see Figure EV5). To replace *CyO,ActGFP* with the *CyO* balancer, the female progeny of the crosses with the recombinant second chromosome (from Step 4), were crossed to the males hemizygous for the *His3.3B* deletion, carrying the *If* marker and the *CyO* balancer (Step 5). Finally, in Step 6, the female and male progeny of Step 5, lacking both the *FM7i,ActGFP* balancer and the *If* marker were selected to establish the strain to be used for the cross described in Figure EV5. The founders of this stock were PCR genotyped as described in Appendix Figure S9.

## Appendix Figure S7

### Step 1

♀  $\frac{y,w,rox1[ex6],rox2[4-9]}{FM7i,ActGFP}; \frac{nos[4L],Sco[rv9R],b[1]}{CyO,ActGFP}; +$  × ♂  $\frac{yw}{+}; \frac{Elav-Gal4,\Delta HisC}{CyO}; \frac{VK33\{H3K36Rx12\}}{TM6,Tb}$

### Step 2

♀  $\frac{w,\Delta His3.3B(w+),hsp-Flp}{w,\Delta His3.3B(w+),hsp-Flp}; \frac{Df(2L)His3.3A}{SM6B,Cy}; +$  × ♂  $\frac{FM7i,ActGFP}{+}; \frac{Elav-Gal4,\Delta HisC}{CyO,ActGFP}; \frac{VK33\{H3K36Rx12\}}{+}$

### Step 3

♀  $\frac{w,\Delta His3.3B(w+),hsp-Flp}{FM7i,ActGFP}; \frac{Elav-Gal4,\Delta HisC}{Df(2L)His3.3A}; \frac{VK33\{H3K36Rx12\} or +}{+}$  × ♂  $\frac{FM7i,ActGFP}{+}; \frac{Elav-Gal4,\Delta HisC}{CyO,ActGFP}; \frac{VK33\{H3K36Rx12\}}{+}$

### Step 4

♀  $\frac{w,\Delta His3.3B(w+),hsp-Flp}{FM7i,ActGFP}; \frac{Df(2L)His3.3A,Elav-Gal4,\Delta HisC}{CyO,ActGFP}; \frac{VK33\{H3K36Rx12\} or +}{+}$  × ♂  $\frac{+}{+}; \frac{lf}{CyO}; \frac{ash1^{9011}}{TM6,Tb}$

### Step 5

♀  $\frac{w,\Delta His3.3B(w+),hsp-Flp}{+}; \frac{Df(2L)His3.3A,Elav-Gal4,\Delta HisC}{CyO}; \frac{VK33\{H3K36Rx12\} or +}{TM6,Tb}$  × ♂  $\frac{w,\Delta His3.3B(w+),hsp-Flp}{+}; \frac{Df(2L)His3.3A,Elav-Gal4,\Delta HisC}{CyO}; \frac{VK33\{H3K36Rx12\} or +}{TM6,Tb}$

### Step 6

♀  $\frac{w?,\Delta His3.3B(w+),hsp-Flp}{+ or w?,\Delta His3.3B(w+),hsp-Flp}; \frac{Df(2L)His3.3A,Elav-Gal4,\Delta HisC}{CyO}; \frac{VK33\{H3K36Rx12\} or +}{TM6,Tb}$  × ♂  $\frac{+ or w?,\Delta His3.3B(w+),hsp-Flp}{+}; \frac{Df(2L)His3.3A,Elav-Gal4,\Delta HisC}{CyO}; \frac{VK33\{H3K36Rx12\} or +}{TM6,Tb}$

### Step 7

♀  $\frac{w?,\Delta His3.3B(w+),hsp-Flp}{w?,\Delta His3.3B(w+),hsp-Flp}; \frac{Df(2L)His3.3A,Elav-Gal4,\Delta HisC}{CyO}; \frac{TM6,Tb}{+}$  × ♂  $\frac{w?,\Delta His3.3B(w+),hsp-Flp}{+}; \frac{Df(2L)His3.3A,Elav-Gal4,\Delta HisC}{CyO}; \frac{VK33\{H3K36Rx12\} or +}{TM6,Tb}$

### Step 8

♀  $\frac{w?,\Delta His3.3B(w+),hsp-Flp}{w?,\Delta His3.3B(w+),hsp-Flp}; \frac{Df(2L)His3.3A,Elav-Gal4,\Delta HisC}{CyO}; \frac{TM6,Tb}{+}$  and ♂  $\frac{w?,\Delta His3.3B(w+),hsp-Flp}{+}; \frac{Df(2L)His3.3A,Elav-Gal4,\Delta HisC}{CyO}; \frac{VK33\{H3K36Rx12\} or +}{TM6,Tb or +}$

**Appendix Figure S7. Generation of *Drosophila* males that combine the *His3.2* and *His3.3* deletions with *Elav-Gal4,ΔHisC* and the *H3K36R* transgene.** To generate the *w,ΔHis3.3B(w<sup>+</sup>),hsp-Flp* ; *Df(2L)His3.3A,ElavGal4,ΔHisC/CyO* ; *VK33{H3K36Rx12}/TM6,Tb/+* fly strain, we started by introducing the first chromosome balancer (*FM7i,ActGFP*) into the *Elav-Gal4,ΔHisC/CyO ;VK33{H3K36Rx12}/TM6,Tb* fly strain (Step 1). The *FM7i,ActGFP* balancer is marked with the dominant marker *Bar*. In the progeny of the Step 1 cross, we selected the male flies showing the *Bar* phenotype (hence *FM7i,ActGFP*), lacking the *Sco* marker on the second chromosome (therefore carrying the *Elav-Gal4* transgene) and lacking the *TM6,Tb* third balancer (thus containing *VK33{H3K36Rx12}*). Those males were crossed with the *w,ΔHis3.3B(w<sup>+</sup>),hsp-Flp; Df(2L)His3.3A/SM6B,Cy* females (Step 2). This introduces the *His3.3B* deletion (balanced over *FM7i,ActGFP*) and generates conditions to recombine the *Df(2L)His3.3A* deletion and the *Elav-Gal4* transgene. To allow the recombination in Step 3, the female offspring from Step 2 that lacked the second chromosome balancer was backcrossed to the same males as in Step 2. In the next step (Step 4), the female progeny from Step 3 that had been balanced over *CyO,ActGFP* was crossed individually to the *If/CyO ; ash1<sup>9011</sup>/TM6,Tb* males. Note that the *VK33{H3K36Rx12}* chromosome is homozygous lethal, probably due to additional mutation. After several days of egg deposition, genomic DNA of the single females from each individual cross was extracted and screened by PCR for the presence of the *Elav-Gal4* transgene, the *ΔHisC* and *ΔHis3.3A* deletions on the second chromosome and the *VK33{H3K36Rx12}* transgene on the third chromosome. For next step, the female and male offspring from the Step 4 individual crosses were selected to have both the *His3.3A,Elav-Gal4,ΔHisC* second chromosome balanced over *CyO*, and the *TM6,Tb* balancer. We also required that the selected flies lacked the *FM7i,ActGFP* balancer, which ensured the presence of the *His3.3B* deletion on the first chromosome. Selected females and males were crossed together (Step 5). In Step 6,

the single females and males with the *TM6,Tb* balancer from the progeny of Step 5 were used to set up individual crosses. Following several days of egg deposition, genomic DNA was of the individual males and females from each cross was extracted and tested by PCR for the presence of the *His3.3B* deletion and the *VK33{H3K36Rx12}* transgene. Note that we can detect the *His3.3B* deletion only if homozygous. In the process, we realized that the females homozygous for the *His3.3B* deletion, heterozygous for the recombinant second chromosome and carrying the *VK33{H3K36Rx12}* transgene on the third chromosome are not viable. Therefore, in step 7, females, homozygous, and males, hemizygous, for the *His3.3B* deletion both carrying the third chromosome balancer were crossed individually. After giving time for egg deposition, DNA was extracted from the single males and females of each cross and used to genotype single flies by PCR. Females were selected for the deletion of *His3.3A*, *His3.3B* and the *HisC* cluster as well as the presence of the *Elav-Gal4* transgene on the second chromosome. Males were additionally selected for the presence of the *VK33{H3K36Rx12}* transgene on the third chromosome. For details of genotyping see Appendix Figure S10. The selected males and females were used in the Step 8 cross. Unfortunately this cross did not result in a stable strain but yielded enough males with the desired genotype (*w,ΔH3.3B(w<sup>+</sup>),hsp-Flp ; Df(2L)His3.3A,ElavGal4,ΔHisC/CyO ; VK33{H3K36Rx12}/TM6,Tb or +*) which were used in the cross described in Figure EV5.

## Appendix Figure S8

- 1: *w, ΔHis3.3B (w+), hsp-Flp ; Df(2L)His3.3A, Elav-Gal4, ΔHisC / Df(2L)His3.3A, UAS-2xYFP, ΔHisC ; VK33{H3K36Rx12} / +*
- 2: *w, ΔHis3.3B (w+), hsp-Flp ; Df(2L)His3.3A / SM6B, Cy ; +/+*
- 3: *yw ; Elav-Gal4, ΔHisC / CyO ; TM6, Tb / VK33{H3K36Rx12}*
- 4: *w ; UAS-2xYFP, ΔHisC / CyO, Ftz, lacZ ; +/+*
- 5: wild-type (Oregon R)
- 6: no-template control

Embryo

Control for deletion of *His3.3B* and *His3.3A*

Positive control for Gal4 and H3K36R amplicons

Control for deletion of *HisC* and presence of YFP

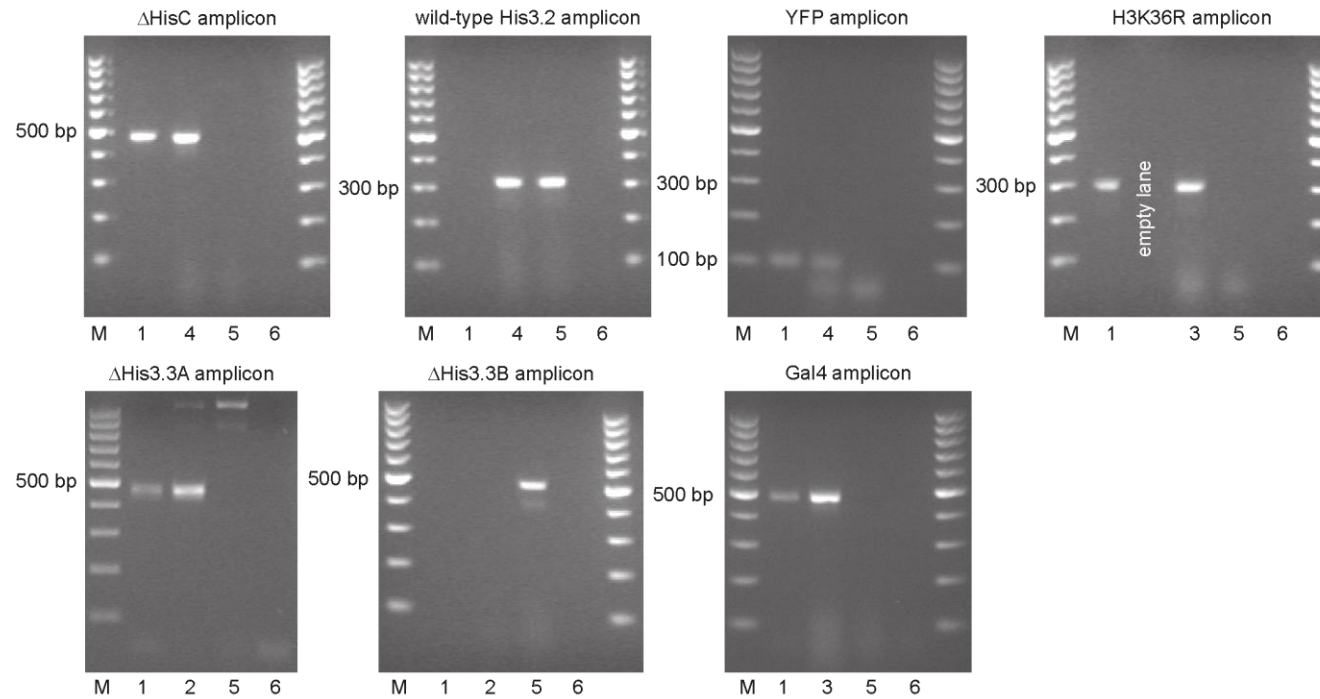

| Amplicon         | Forward primer | Reverse primer | Product in mutant/transgenic line | Product in wild-type |
|------------------|----------------|----------------|-----------------------------------|----------------------|
| ΔHis3.3A         | His3.3A fwd    | His3.3A rev    | 450 bp                            | 1054 bp              |
| ΔHis3.3B         | His3.3B fwd    | His3.3B rev    | No product                        | About 500 bp         |
| ΔHisC            | HisC.2         | Pry4           | About 500 bp                      | No product           |
| H3K36R           | H3K36R         | His3-rev       | 300 bp                            | No product           |
| Gal4             | osGAL4:DBD-fw  | CP190-GAL4     | About 500 bp                      | No product           |
| YFP              | eGFP F         | eGFP R         | About 100 bp                      | No product           |
| Wild-type His3.2 | H3WT           | His3-rev       | No product                        | 300 bp               |

**Appendix Figure S8. PCR genotyping of a Class I embryo from the cross on Figure EV5 (YFP positive, wild-type zygotic H3.2 and H3.3 histones replaced with H3R36).** Shown are the results of one representative genotyping experiment. To verify the identity of the Class I embryos described in Figure EV5, the genomic DNA from a single YFP+ embryo was extracted and subjected to seven separate PCR reactions using primer pairs specific for different histone H3 deletions, the presence of the *His3.2* gene and the *Elav-Gal4*, *UAS-2xYFP* and *VK33{H3K36Rx12}* transgenes. The products of each PCR reaction were analyzed by the electrophoresis in 2% agarose gel. M = 100bp DNA Ladder.



## Appendix Figure S9

- 1: *w,ΔHis3.3B (w+),hsp-Flp ; Df(2L)His3.3A,UAS-2xYFP,ΔHisC / CyO ; +/+* Female #1  
 2: *w,ΔHis3.3B (w+),hsp-Flp ; Df(2L)His3.3A,UAS-2xYFP,ΔHisC / CyO ; +/+* Female #2  
 3: *w,ΔHis3.3B (w+),hsp-Flp ; Df(2L)His3.3A,UAS-2xYFP,ΔHisC / CyO ; +/+* Male #1  
 4: *w,ΔHis3.3B (w+),hsp-Flp ; Df(2L)His3.3A / SM6B,Cy ; +/+* Control for deletion of *His3.3B* and *His3.3A*  
 5: *w ; UAS-2xYFP,ΔHisC / CyO,Ftz,lacZ ; +/+* Control for deletion of *HisC* and presence of *YFP*  
 6: wild-type (Oregon R)  
 7: no-template control

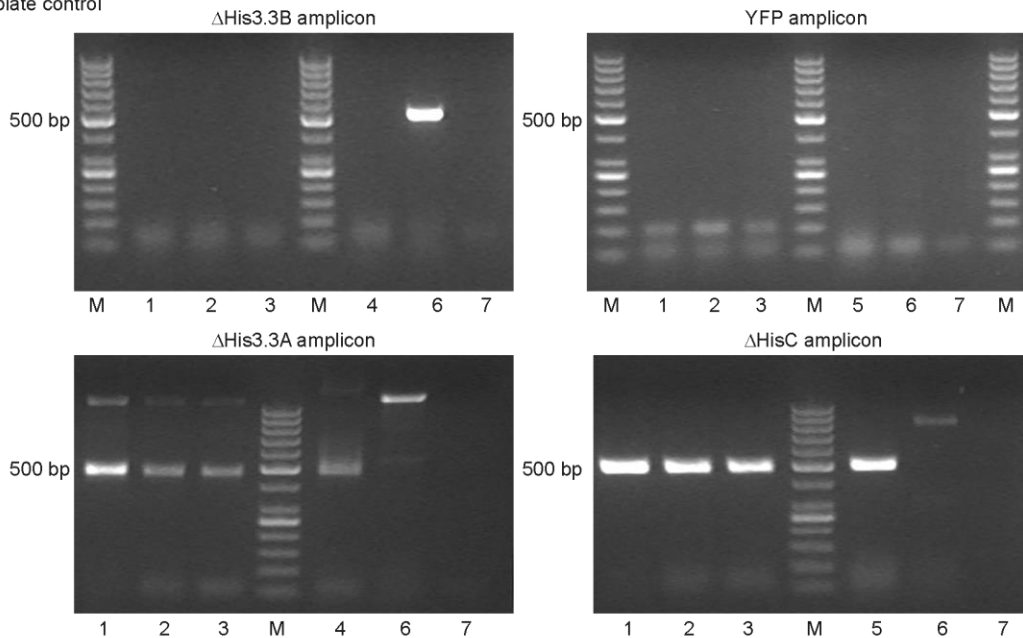

| Amplicon | Forward primer | Reverse primer | Product in mutant/transgenic line | Product in wild-type |
|----------|----------------|----------------|-----------------------------------|----------------------|
| ΔHis3.3A | His3.3A fwd    | His3.3A rev    | 450 bp                            | 1054 bp              |
| ΔHis3.3B | His3.3B fwd    | His3.3B rev    | No product                        | About 500 bp         |
| ΔHisC    | HisC.2         | Pry4           | About 500 bp                      | No product           |
| YFP      | eGFP F         | eGFP R         | About 100 bp                      | No product           |

**Appendix Figure S9. PCR-genotyping of the parental flies for the cross of Step 6 on Appendix Figure S6.** The selection of the parents (2 females and 1 male) for the correct cross described in Appendix Figure S6 (Step 6) was done by PCR. Genomic DNA was extracted from individual flies and a set of PCR reactions with specific primer pairs (described in the table below) were used to detect the deletion of the histone cluster ( $\Delta HisC$ ), the deletions of the *His3.3A* and *His3.3B* genes and the presence of the *UAS-2xYFP* transgene. Shown are the pictures of the indicated PCR products separated by electrophoresis in 2% agarose gel. 100bp DNA Ladder marker is indicated as M.

## Appendix Figure S10

- 1: *w?*, $\Delta$ *His3.3B* (*w+*),*hsp-Flp* ; *Df(2L)His3.3A,Elav-Gal4, $\Delta$ HisC / CyO* ; *TM6,Tb / +* Female  
 2: *w?*, $\Delta$ *His3.3B* (*w+*),*hsp-Flp* ; *Df(2L)His3.3A,Elav-Gal4, $\Delta$ HisC / CyO* ; *TM6,Tb / VK33{H3K36Rx12}* Male  
 3: *w*, $\Delta$ *His3.3B* (*w+*),*hsp-Flp* ; *Df(2L)His3.3A / SM6B,Cy ; +/+*  
 4: *yw* ; *Elav-Gal4, $\Delta$ HisC / CyO* ; *TM6,Tb / VK33{H3K36Rx12}*  
 5: wild-type (Oregon R)  
 6: no-template control

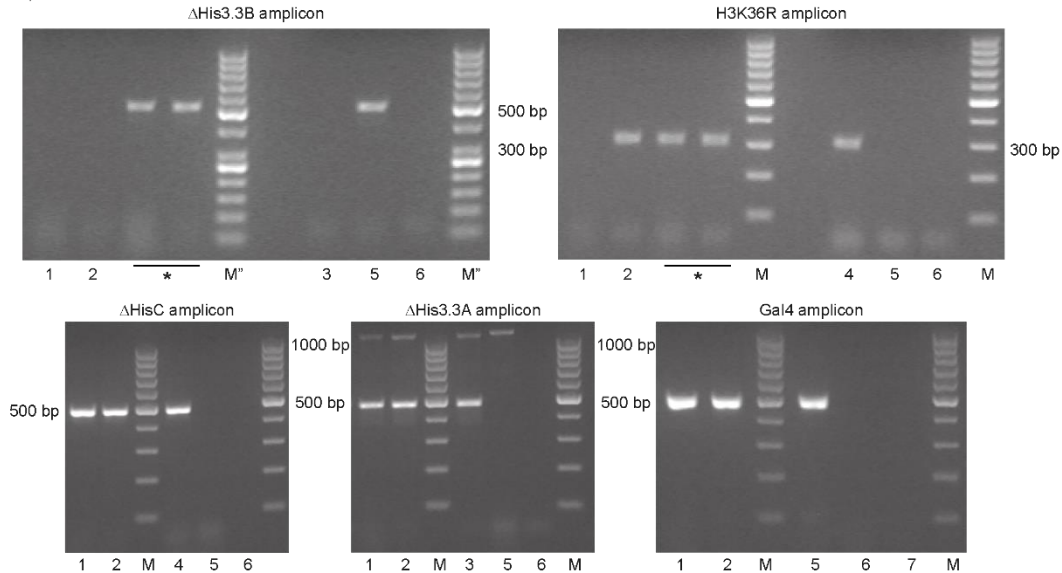

| Amplicon         | Forward primer | Reverse primer | Product in mutant/transgenic line | Product in wild-type |
|------------------|----------------|----------------|-----------------------------------|----------------------|
| $\Delta$ His3.3A | His3.3A_fwd    | His3.3A_rev    | 450 bp                            | 1054 bp              |
| $\Delta$ His3.3B | His3.3B_fwd    | His3.3B_rev    | No product                        | About 500 bp         |
| $\Delta$ HisC    | HisC.2         | Pry4           | About 500 bp                      | No product           |
| H3K36R           | H3K36R         | His3-rev       | 300 bp                            | No product           |
| Gal4             | osGAL4:DBD-fw  | CP190-GAL4     | About 500 bp                      | No product           |

**Appendix Figure S10. PCR-genotyping of the parental flies for the cross of Step 7 on Appendix Figure S7.** The selection of the parents (1 female and 1 male) for the correct cross described in Appendix Figure S7 (Step 7) was done by PCR genotyping. Genomic DNA was extracted from individual flies and a set of PCR reactions with specific primer pairs (described in the table below) were used to detect the deletion of the histone cluster ( $\Delta$ *HisC*), the deletions of the *His3.3A* and *His3.3B* genes and the presence of the *Elav-Gal4* and *VK33{H3K36Rx12}* transgenes. Shown are the pictures of the indicated PCR products separated by the electrophoresis in 2% agarose gel. Lanes marked with asterisks correspond to PCR reactions with genomic DNAs of single flies with undesirable genotypes. Crosses with such parents were discarded. 100bp DNA Ladder marker is indicated as M; 50bp DNA Ladder marker is indicated as M''.

## Appendix Figure S11

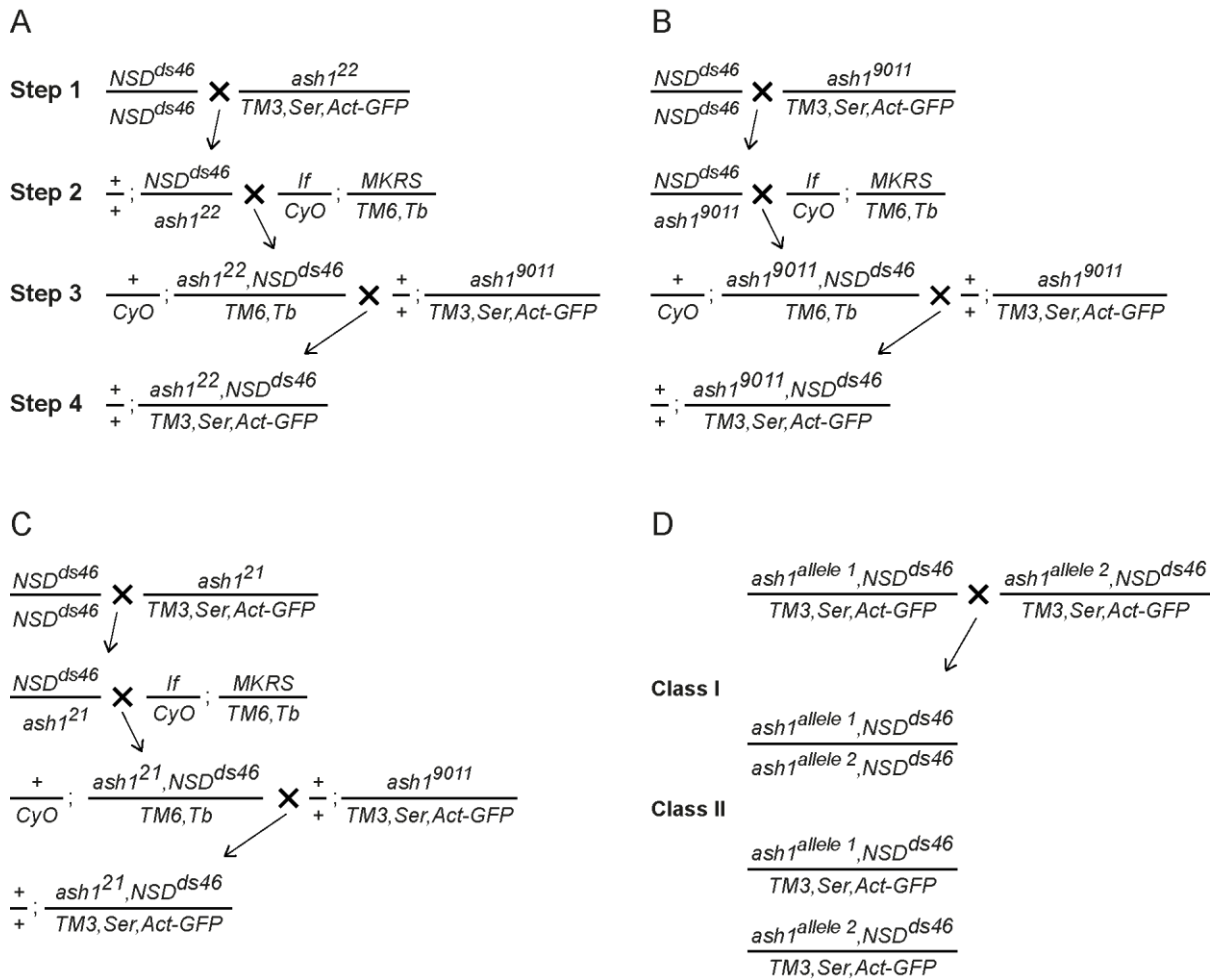

**Appendix Figure S11. Recombination of *ash1* and *NSD* mutations.** The *NSD* loss of function allele, *NSD<sup>ds46</sup>*, was recombined with three different *ash1* alleles, namely *ash1<sup>22</sup>* (A), *ash1<sup>9011</sup>* (B), and *ash1<sup>21</sup>* (C) using identical set of crosses. First, the homozygous *NSD<sup>ds46</sup>* fly strain was crossed with the *ash1* mutant strain in which the *ash1* allele was balanced over the *TM3, Ser, Act-GFP* balancer chromosome (Step 1). In Step 2, the males of the *TM6, Tb* balancer chromosome strain were crossed with the female progeny of Step 1 that lacked the *TM3* balancer. The recombination between the *NSD<sup>ds46</sup>* and *ash1* alleles occurred in these females. In the *NSD<sup>ds46</sup>* deletion, the coding region of *NSD* is replaced with the *DsRed* ORF. Therefore, the female progeny of Step 2 were selected based on the RFP signal and the presence of the

*TM6,Tb* balancer and crossed individually to the *ash1<sup>9011</sup>/TM3,Ser,Act-GFP* males (Step 3). After egg deposition, genomic DNA was extracted from the females in each individual cross and screened by PCR for the presence of the relevant *ash1* allele (see Appendix Figure S12). The progeny of the crosses with females carrying the recombinant chromosome, balanced over *TM3,Ser,Act-GFP* balancer was used to establish the strains shown as Step 4. **(D)** Generation of the *ash1,NSD* double mutant animals. The *NSD<sup>ds46</sup>* allele is homozygous viable, however, the *ash1<sup>22</sup>*, *ash1<sup>9011</sup>*, and *ash1<sup>21</sup>* chromosomes all carry additional unrelated lethal mutations. Therefore, to obtain the *ash1,NSD* double-mutants, different *NSD<sup>ds46</sup>,ash1* fly strains were crossed to each other and the GFP-negative first instar larvae (Class I, double mutants) were separated from the GFP-positive (Class II) larvae and grown separately to avoid competition.

## Appendix Figure S12

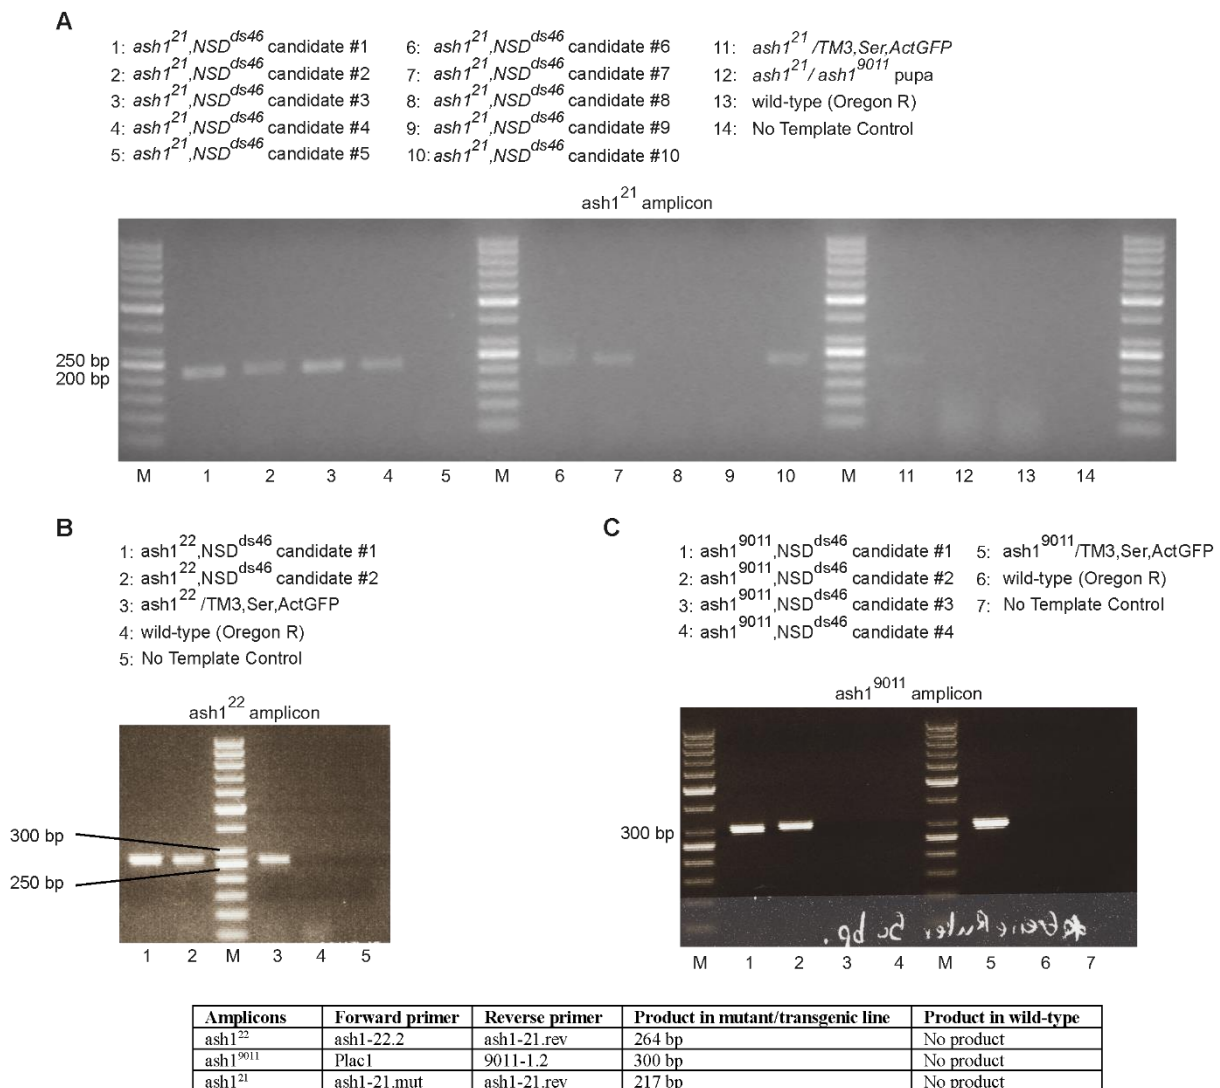

**Appendix Figure S12. Genotyping *ash1*, *NSD*<sup>ds46</sup> recombinants.** The single flies described in Appendix Figure S11A-C, were genotyped by PCR, using primers specific for *ash1* mutations. The presence of RFP (thus deletion of *NSD*) was checked prior to DNA extraction and only the RFP-positive flies were selected for further screening for the *ash1* mutations. **(A)** The screen for the *ash1*<sup>21</sup> allele. Forward primer in the *ash1*<sup>21</sup> amplicon is designed to match the single nucleotide substitution in the *ash1*<sup>21</sup> mutation and therefore anneals only to the mutant genomic DNA but not to the wild-type *ash1*. Seven out of ten single flies shown here contain the *ash1*<sup>21</sup>,*NSD*<sup>ds46</sup> recombinant chromosome. **(B)** The screen for the *ash1*<sup>22</sup> allele. In

this case, one of the primers is specific for the *ash1<sup>22</sup>* allele, therefore the PCR product is seen only in the mutant but not in the wild-type flies. Only two single flies positive for *ash1<sup>22</sup>* mutation are shown here. (C) The screen for the *ash1<sup>9011</sup>* allele. One of the primers (9011-1.2) in the *ash1<sup>9011</sup>* amplicon is specific to the genomic DNA flanking the deletion and the other primer is specific to the remnant of the transposon used to generate the deletion. Therefore, the *ash1<sup>9011</sup>* amplicon yields the product only from the mutant but not the wild-type DNA. Out of four flies shown here, the two contain the *ash1<sup>9011</sup>* deletion. PCR products were analyzed by the electrophoresis in 2% agarose gel. M = 50bp DNA Ladder.

**Appendix Table S1. The list of oligonucleotide sequences.**

| <b>Oligonucleotide</b> | <b>sequence</b>                                   |
|------------------------|---------------------------------------------------|
| 1gRNA_NSD_asen         | AAACTCGATCTCGGAGTGCGCGTC                          |
| 1gRNA_NSD_sens         | CTTCGACGCGCACTCCGAGATCGA                          |
| 2gRNA_NSD_asen         | AAACTCAACTACTTGTGGGACGAC                          |
| 2gRNA_NSD_sens         | CTTCGTCGTCCCACAAGTAGTTGA                          |
| 3R-nc-1.1              | TTGCGGAGCGTGAGCGGAAG                              |
| 3R-nc-1.2              | AAGCCAGGAGAACGGCACGC                              |
| 9011-1.2               | CAGTGCCTTGGCAGTTGATGTC                            |
| Abd-B_F_ex             | CCACTGCATATACCCGCCAT                              |
| Abd-B_R_ex             | AATCCCTCGTCGTTGTAGGC                              |
| ASH1_mE_Fwd            | TGGATCCCCGGAATTGCAGCTCTTTGTGGAGGCCAAG             |
| ASH1_seq10             | AGCCATTGATTACCAAGAGTGCG                           |
| ASH1_seq11             | ATTCGGGTGTGATAAGCACCCAC                           |
| ASH1_seq12             | TTTCGTCAGAGGAGGAACCTGG                            |
| ASH1_seq2              | TGCTAAGTGCTATCATCCAGGC                            |
| ASH1_seq3              | CCAGGAGTAAGCGACGGCAG                              |
| ASH1_seq4              | TGATGAACCAGCGTAAAGAAACCC                          |
| ASH1_seq5              | AATGGGAAATTGAACGCAGAGGC                           |
| ASH1_seq6              | ACAACAGCCGTGATTGATGAGC                            |
| ASH1_seq7              | ATTCCTACCGAGCACGATCCC                             |
| ASH1_seq8              | ACTAAGCTACCCATTGCGAAGGG                           |
| ASH1_seq9              | AAAAGATACGCAGATGCAAGGCC                           |
| ash1-21.mut            | CAACCGCATGGTTTATACGA                              |
| ash1-21.rev            | CTGCTTGAATTCCTTTTCCG                              |
| ash1-22.2              | GTGCAGCGTTCGGACACCGA                              |
| ash1-22.R              | CCGACTGTGCCCGCTGGATG                              |
| ash1-22-rev            | TCCGAGGAAAATGCCGAGATCTA                           |
| ASH1CN_Cfwd            | AGATCTCCAAGAGCTATGCGC                             |
| ASH1CN_Crev            | GTCTAGATATCTCGATTACTCGAGTGTTGAGTTGGCCGTAGAACTG    |
| ASH1CN_Nfwd            | AGTCGACTGGATCCGACCATGGGTACCAGCTGTAGCCAAAATGAGACGG |
| ASH1CN_Nrev            | AGCTCTTGGAGATCTGTGACTTCTTAGACTTAGACAC             |
| CP190-GAL4:DBD-rev     | ACTTCACCCAGTGCGGCCCGCCGATACAGTCAACTGTCTTTGACCTT   |
| deltaPHD_A             | CAGAAGGCCAAAAAGCATGCTC                            |
| deltaPHD_B             | CCACTTCATCCTCATCAGGAGAGGCCTC                      |
| deltaPHD_C             | ATGAGGATGAAGTGGATCGAGAAATTC                       |
| deltaPHD_D             | TGACCAACTCAATGGGTACCAC                            |
| deltaSET_A             | ATCCGCACCAATGTATACGCAG                            |
| deltaSET_B             | AGGGATTGACGGCATGTCGCTGGATCTTC                     |
| deltaSET_C             | ATGCCGTCAATCCCTCAGAGGGTCAGCC                      |

| <b>Oligonucleotide</b> | <b>sequence</b>                                                                                                       |
|------------------------|-----------------------------------------------------------------------------------------------------------------------|
| deltaSET_D             | CCGCCTGCCGTTGAGC                                                                                                      |
| DonR_forB              | CAATAGCATCACAAATTTACAAATAAAG                                                                                          |
| DonR_revA              | GATCCTAATTGAATTAGCTCTAATTG                                                                                            |
| eGFP_F                 | CAAGGACGACGGCAACTACA                                                                                                  |
| eGFP_R                 | CCTCCTTGAAGTCGATGCC                                                                                                   |
| emc.1.1                | GATCCAGATATCCTCGCCCAGC                                                                                                |
| emc.1.2                | CCACAAGAGTGTTGGGCGTTTG                                                                                                |
| emc-2.1                | GAGCGAGTTTTCTCACGCAG                                                                                                  |
| emc-2.2                | GCAGGTCGAGTTTTCAACGG                                                                                                  |
| gen_1_NSD              | TAAACTGGACCGCAGAATGAAG                                                                                                |
| gen_16_NSD             | GTGTTTCACCTTGGGAGTCTTC                                                                                                |
| H3K36R                 | GCCACCGGAGGTGTGCGC                                                                                                    |
| H3WT                   | CAGCCACCGGAGGTGTGAAG                                                                                                  |
| HA-1-PstI              | TACTGCAGTCTTGATAAAGTCGTCCATGCTCCTTG                                                                                   |
| HA-1-SpeI              | TAACTAGTATCTCGGAGTGCGCGTCCGTGCTCAGC                                                                                   |
| HA-2-EcoRI             | TA GAATTC TCCGTGCGCAACTGCCTGAAGCTG                                                                                    |
| HA-2-NotI              | TAGCGGCCGC ACTACTTGTGGGACGACTTAATG                                                                                    |
| His3.3A_fwd            | TAGGGTCACACTGAGCAGACGC                                                                                                |
| His3.3A_rev            | TGAATGCATTTACTACATGG                                                                                                  |
| His3.3B_fwd            | TCTGTGTCAATCTGGAACGC                                                                                                  |
| His3.3B_rev            | GAGAAATTCATATGAGTTGGATAACC                                                                                            |
| His3-rev               | AATGCGTCGCGCTAACTGGATG                                                                                                |
| HisC.2                 | TTACGCCGATAAGACACTAACG                                                                                                |
| hth.1.1                | TGTGTTTTTGGCGACGGCAATTTG                                                                                              |
| hth.1.2                | GCCGCGGAGGGAATTTCTTTC                                                                                                 |
| hth-2.1                | GACCGCTCCGAAAAGTAGGG                                                                                                  |
| hth-2.2                | AACTCCGGACTCGGACTCTT                                                                                                  |
| Mes-4-RI-2.1           | CTAATACGACTCACTATAGGGAGTTCAGTCCGGCAAAGGTCAGC                                                                          |
| Mes-4-RI-2.2           | CTAATACGACTCACTATAGGGAGTACATGAGCCCCATCGAGAAGC                                                                         |
| noc-exp-1.1            | AGATTTCCGCGCACGATTCTTC                                                                                                |
| noc-exp-1.2            | TTCCGTTGGCATTGTTACGACC                                                                                                |
| NSD_back               | TTACTCGTCCTTCGCATCCATTGGCTCA                                                                                          |
| NSD-Rt-1f              | CCATGGTGAACAGGAAACGAG                                                                                                 |
| NSD-Rt-1r              | CATCTGTCCGGTCAACTTCCTCATC                                                                                             |
| OneStrep_fwd           | TGGATCCGACCATGGCTAGCTGGAGCCACCCGCAGTTCGAGAAAGGTGG<br>AGGTTCCGGAGGTGGATCGGGAGGTGGATCGTGGAGCCACCCGCAGTTC<br>GAAAAAGGCGC |
| OneStrep_rev           | TTTTGGCTACAGCTGGCGCCTTTTTTCGAACTGCGGGTGGCTCCACGATCCA<br>CCTCCCATCCACCTCCGGAACCTCCACCTTTCTCGAACTGCGGGTGGCTC<br>CAGGTAC |
| osGAL4:DBD-fw          | TTCGAAAAAGCGGCCAAGCTACTGTCTTCTATCGAACAAGCAT                                                                           |
| Plac1                  | CACCCAAGGCTCTGCTCCCACAAT                                                                                              |



| <b>Oligonucleotide</b> | <b>sequence</b>                         |
|------------------------|-----------------------------------------|
| Pry4                   | CAATCATATCGCTGTCTCACTCA                 |
| rp49for                | TGTCCTTCCAGCTTCAAGATGACCATC             |
| rp49rev                | CTTGGGCTTGCGCCATTTGTG                   |
| RpL32-ex1.1            | TGGGCGATCTCGCCGCAGTA                    |
| RpL32-ex1.2            | CAGAGTGCCTCGCCGCTTCA                    |
| Su(z)2-2.1             | CGTGCCGGTTCGAACTGTTAT                   |
| Su(z)2-2.2             | TCCTTAGCCCGCTTTCTGTT                    |
| Su(z)2-ex1.1           | GCCAAGGCCCAGAGCTACGC                    |
| Su(z)2-ex1.2           | GGTGGTCCCATCAAGCGGGC                    |
| Taf4-ex1.1             | AGCCCGCAGCCGTGTTTGAT                    |
| Taf4-ex1.2             | CGTGCTGCGGCGGAGGTTTA                    |
| Ubi-1.1                | GGCGGCCGTTACTAGAAGGATCCTTTAGGCTTTTGCC   |
| Ubi-1.2                | TTGATGATCCACTAGTTTGGATTATTCTGCGGGAAGAAA |
| U-ex1.1                | GTCTTTGTAGCCATTCACCG                    |
| U-ex1.2                | CCCTATGCCAACCACCATC                     |

**Appendix Table S2. The list of antibodies.**

| <b>Antigen</b>               | <b>Host</b>       | <b>Reference/company/catalogue #</b>      | <b>IF</b> | <b>Western</b> | <b>ChIP</b> |
|------------------------------|-------------------|-------------------------------------------|-----------|----------------|-------------|
| H3K36me1                     | rabbit monoclonal | Cell Signaling, D9J1D, Cat#14111          | -         | 1:2000         | 1:250       |
| H3K36me2                     | mouse monoclonal  | Active motif, MABI0332, Cat#61019         | -         | 1:1000         | 1:100       |
| H3K36me3                     | rabbit monoclonal | Cell Signaling, D5A7, Cat#4909            | 1:200     | 1:2000         | -           |
| H3K27me2                     | rabbit monoclonal | Cell Signaling, Cat#9728S                 | -         | 1:2000         | -           |
| H3K27me3                     | rabbit polyclonal | Millipore (Upstate), 07-449               | -         | 1:2000         | -           |
| BEAF-32                      | rabbit polyclonal | #21352 gift from H. Saumweber             | -         | 1:2000         | -           |
| H3K18Ac                      | rabbit polyclonal | Abcam, # ab1191                           | 1:200     | -              | -           |
| Ash1                         | rabbit polyclonal | Kahn at al., 2016                         | -         | -              | 1:100       |
| Ash1                         | rabbit polyclonal | against aa 2156-2217, gift from V.Pirrota | -         | 1:500          | -           |
| Abd-B                        | mouse monoclonal  | DHSB, 1A2E9                               | 1:10      | -              | -           |
| Ubx                          | mouse monoclonal  | DHSB, Ubx FP3.38                          | 1:50      | -              | -           |
| Anti-rabbit Alexa-488        | Goat              | Invitrogen, # A-11008                     | 1:500     | -              | -           |
| anti-mouse Alexa-555         | Goat              | Abcam, # ab150114                         | 1:500     | -              | -           |
| Anti-Rabbit AP conjugated    | Goat polyclonal   | Promega, #S3731                           | -         | 1:10000        | -           |
| Anti-Mouse IgG AP conjugated | Goat polyclonal   | Sigma, A3562                              | -         | 1:10000        | -           |
| Anti-Elav (68 µg/ml)         | mouse monoclonal  | DHSB, Elav-9F8A9-s                        | 5 µg/ml   | -              | -           |

**Appendix Table S3. Amplicons used in ChIP-qPCR.**

| <b>Amplicon name</b> | <b>Oligo name</b> | <b>ChIP</b>              |
|----------------------|-------------------|--------------------------|
| intergenic           | 3R-nc-1.1         | Ash1, H3K36me1, H3K36me2 |
|                      | 3R-nc-1.2         |                          |
| noc                  | noc-exp-1.1       | Ash1, H3K36me1, H3K36me2 |
|                      | noc-exp-1.2       |                          |
| hth                  | hth.1.1           | Ash1                     |
|                      | hth.1.2           |                          |
|                      | hth-2.1           | H3K36me1, H3K36me2       |
|                      | hth-2.2           |                          |
| Ubx                  | U-ex1.1           | Ash1, H3K36me1, H3K36me2 |
|                      | U-ex1.2           |                          |
| Su(z)2               | Su(z)2-2.1        | Ash1                     |
|                      | Su(z)2-2.2        |                          |
|                      | Su(z)2-ex1.1      | H3K36me1, H3K36me2       |
|                      | Su(z)2-ex1.2      |                          |
| emc                  | emc.1.1           | Ash1, H3K36me1           |
|                      | emc.1.2           |                          |
|                      | emc-2.1           | H3K36me2                 |
|                      | emc-2.2           |                          |
| Taf4                 | Taf4-ex1.1        | Ash1, H3K36me1, H3K36me2 |
|                      | Taf4-ex1.2        |                          |
