# Supplementary material
Source: PubMed Central journal article supplement (PMC6446198)

Scans of full Western blot and coomassie staining gel corresponding to Figure 2.

Scan of full Western blot for figure 2B

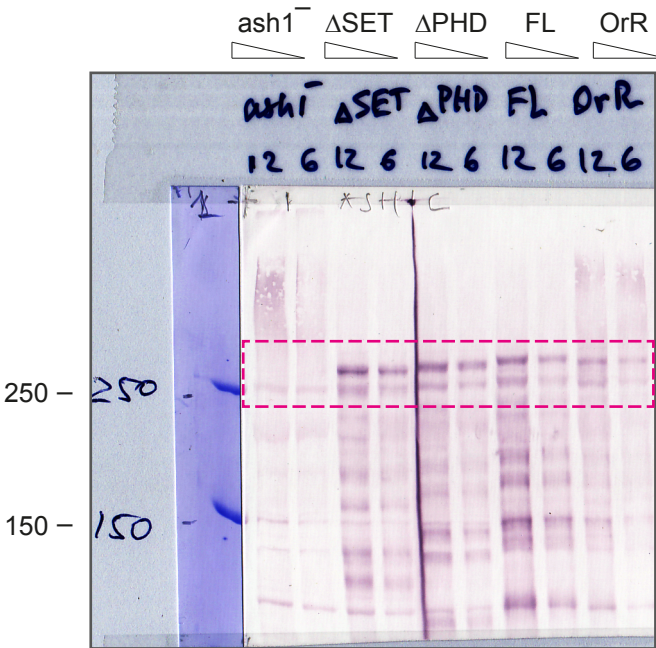

Scan of full coomassie gell for figure 2C

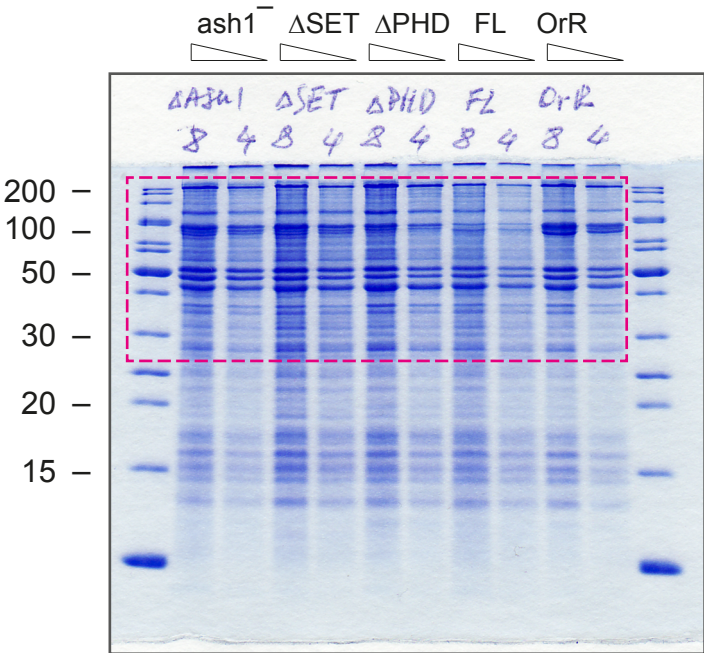

Supplement: EMBR-20-e46762-s003.pdf [file EMBR-20-e46762-s003.pdf]
