# Supplementary material
Source: PubMed Central journal article supplement (PMC6446198)

# Scans of full Western blots corresponding to Figure 3

## Scans of full Western blots for figure 3A

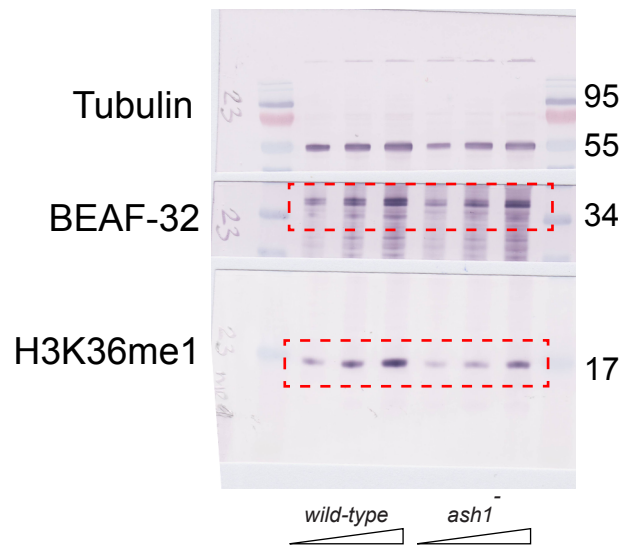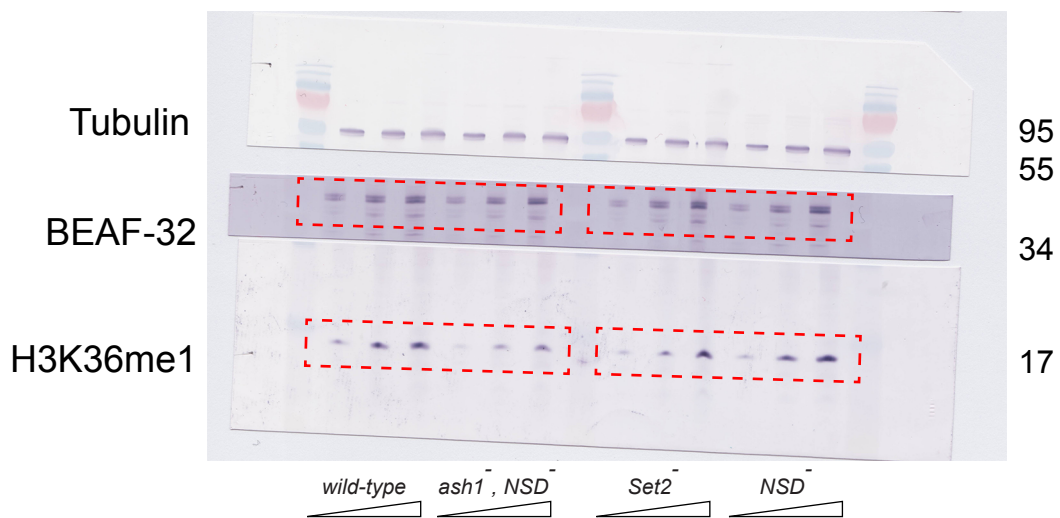

# Scans of full Western blots for figure 3B

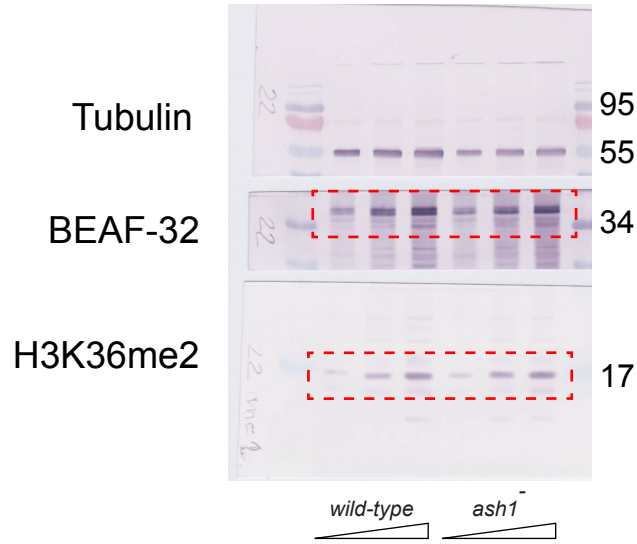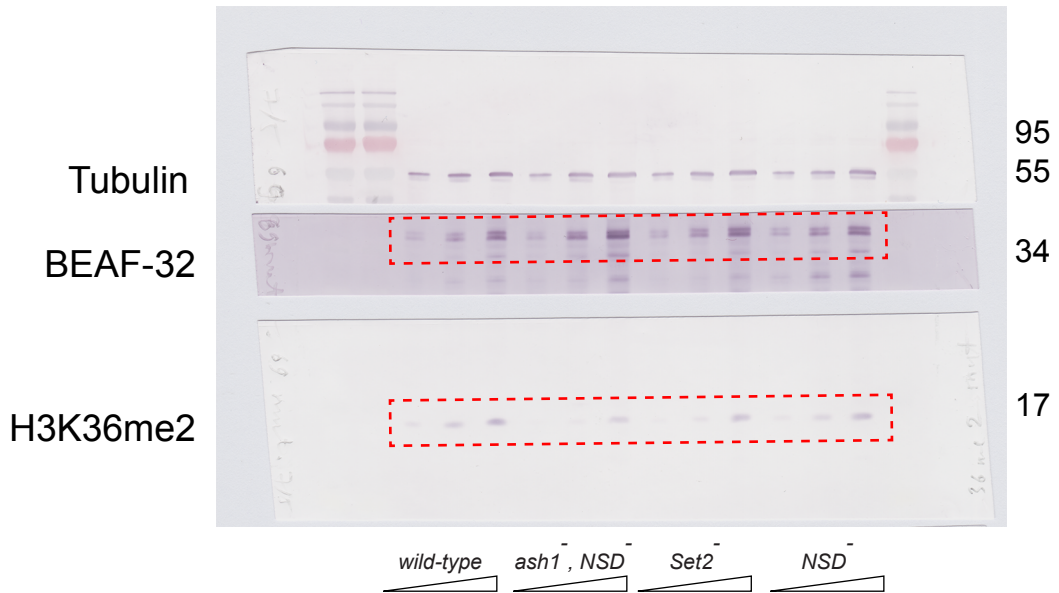

# Scans of full Western blots for figure 3C

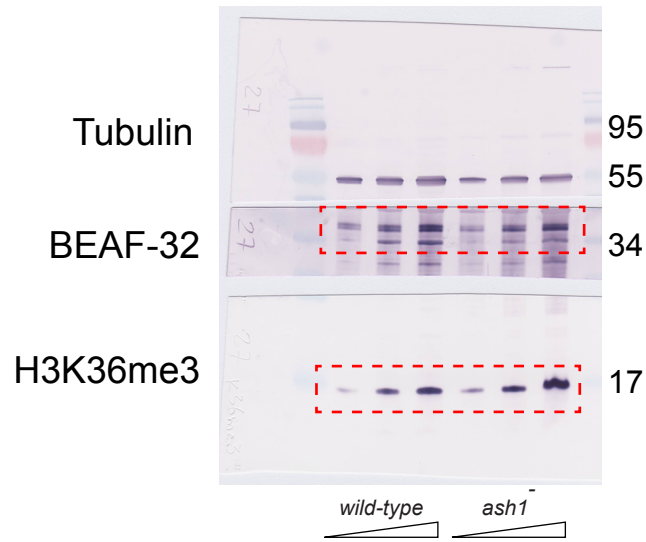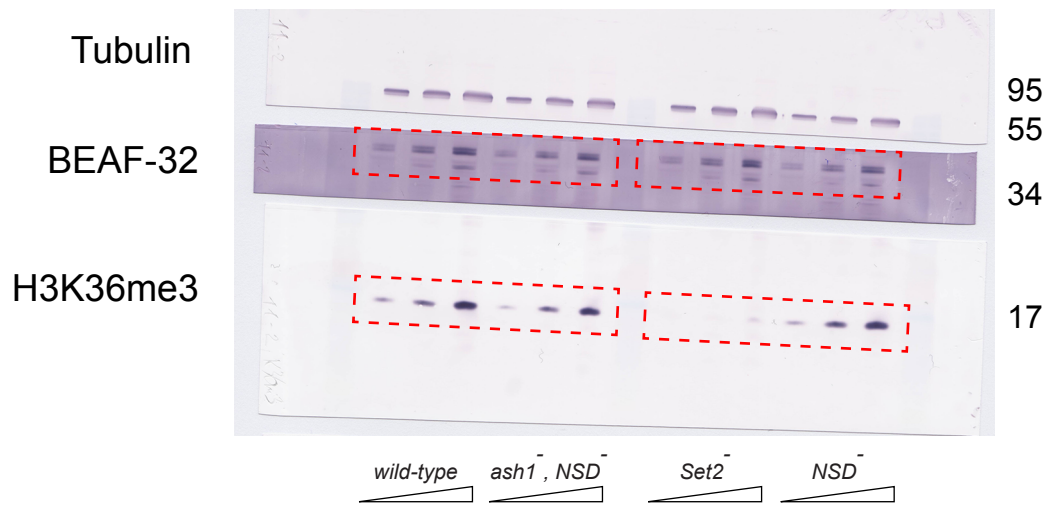

Supplement: EMBR-20-e46762-s004.pdf [file EMBR-20-e46762-s004.pdf]
