# Supplementary material
Source: PubMed Central journal article supplement (PMC6446198)

# Scans of full Western blots corresponding to Figure EV2

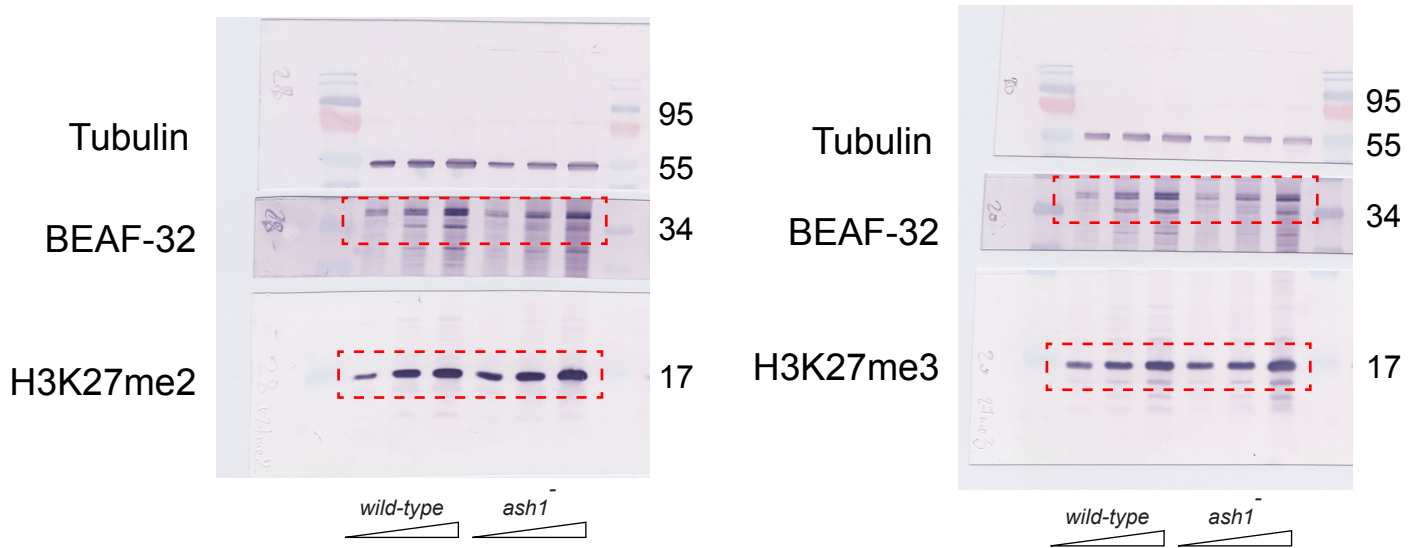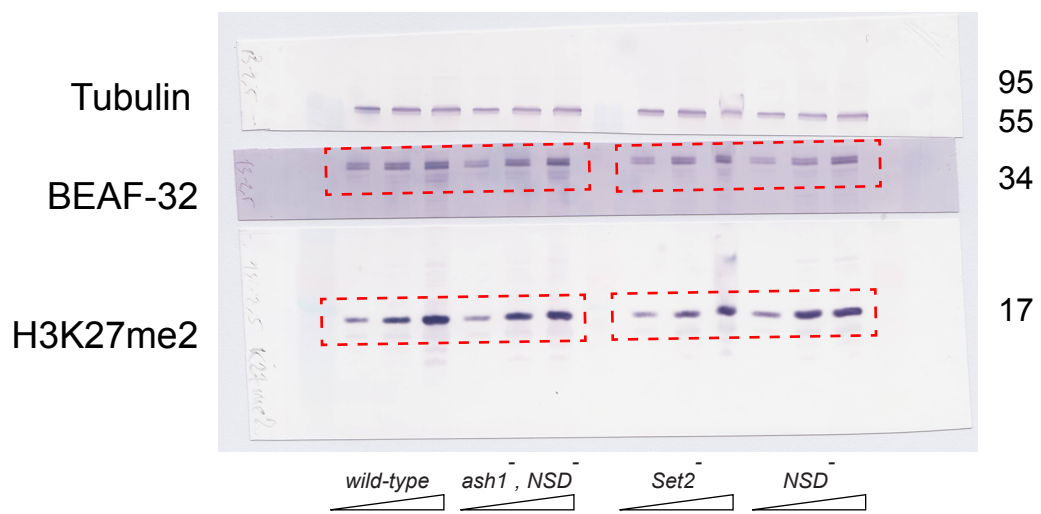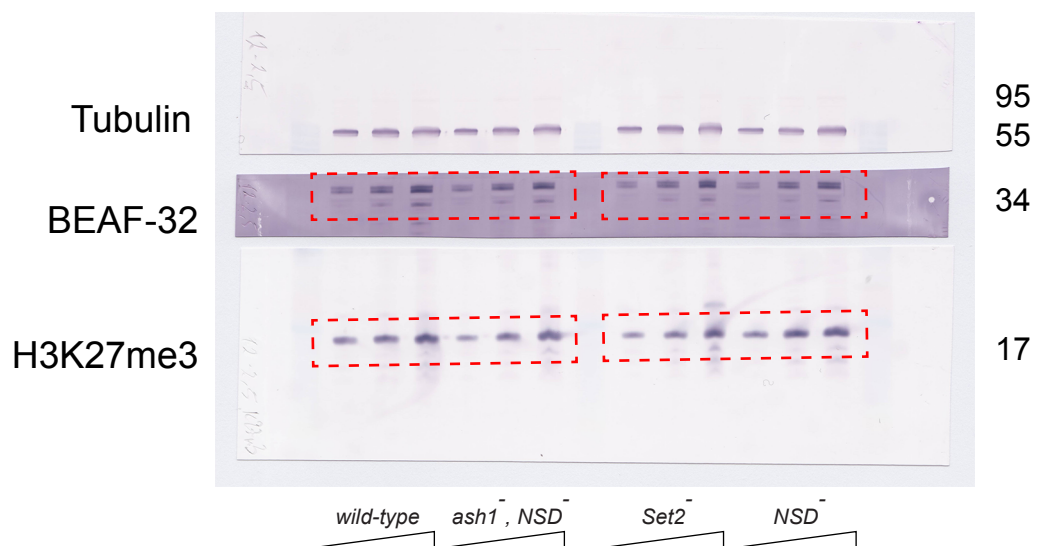

Supplement: EMBR-20-e46762-s005.pdf [file EMBR-20-e46762-s005.pdf]
